# Supplementary material for: Aurantoside C Targets and Induces Apoptosis in Triple Negative Breast Cancer Cells
Source: MDPI journal article supplement (doi:10.3390/md16100361), 2018-10-01

Article

# Aurantoside C targets and induces apoptosis in Triple Negative Breast Cancer cells

Sumi Shrestha<sup>1,2</sup>, Anabel Sorolla<sup>2</sup>, Jane Fromont<sup>3</sup>, Pilar Blancafort<sup>2\*</sup>, and Gavin R. Flematti<sup>1\*</sup>

<sup>1</sup> School of Molecular Sciences, The University of Western Australia, Crawley, Western Australia, 6009, Australia;

<sup>2</sup> Cancer Epigenetics, Harry Perkins Institute of Medical Research, QEII Medical Centre and Centre for Medical Research, The University of Western Australia, Crawley, Western Australia, 6009, Australia;

<sup>3</sup> Western Australian Museum, Welshpool, Western Australia 6106, Australia;

\* Correspondence: gavin.flematti@uwa.edu.au; Tel.: +61 6488 4461 (Chemistry) (G.R.F)

pilar.blancafort@uwa.edu.au; Tel.: +61 8615 1099 (Cancer Biology) (P.B)

Received: date; Accepted: date; Published: date

## Contents:

- S1. <sup>1</sup>H NMR of Aurantoside C (C828) in CD<sub>3</sub>OD (500MHz)
- S2. <sup>13</sup>C NMR of Aurantoside C (C828) in CD<sub>3</sub>OD (500MHz)
- S3. Cell viability of C828 in A. SUM159PT cells, B. MCF7 cells, and C. MCF10A cells at 24 h, 48 h and 72 h

S1.  $^1\text{H}$  NMR of Aurantioside C (C828) in  $\text{CD}_3\text{OD}$  (500MHz)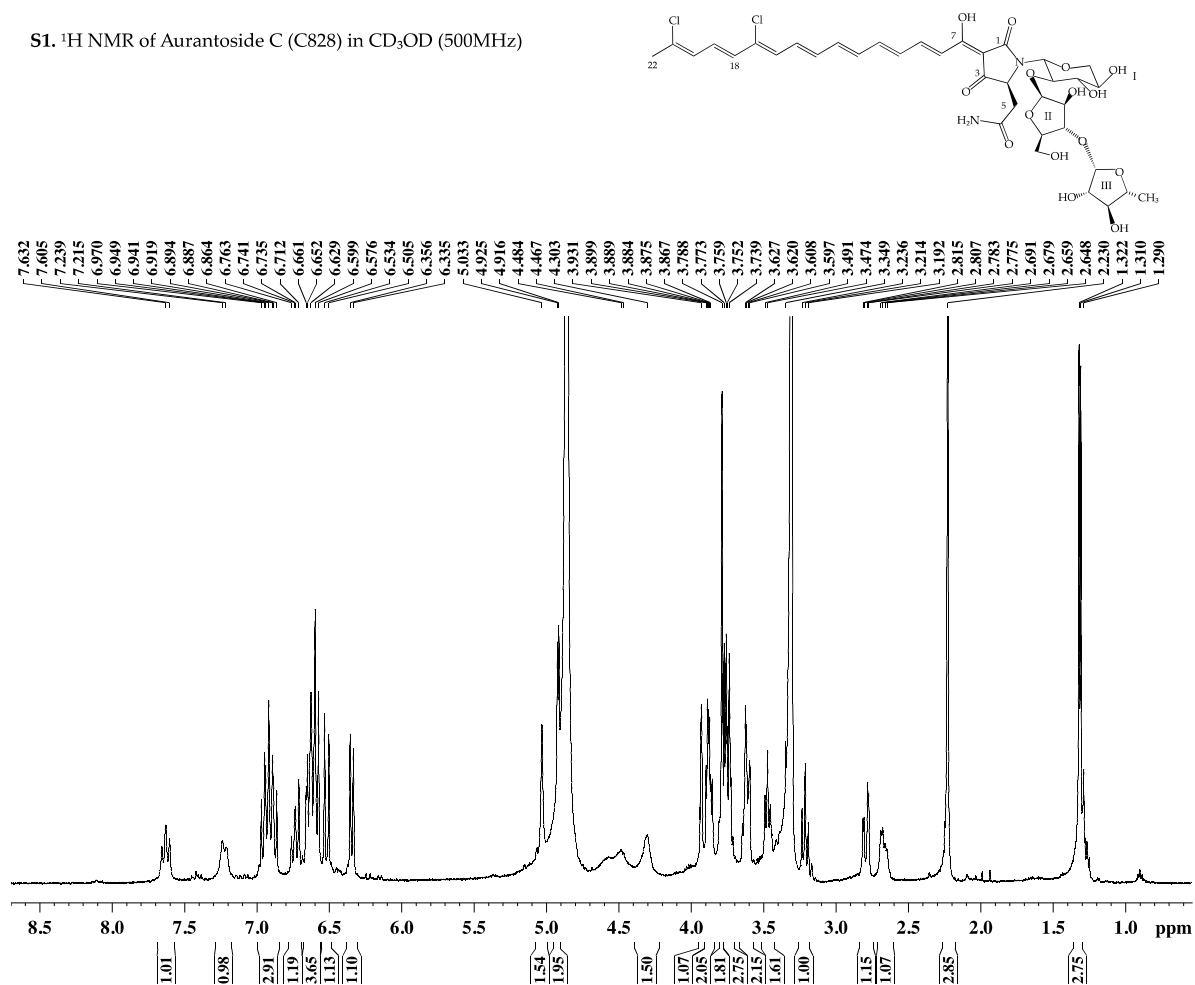

S2.  $^{13}\text{C}$  NMR of Aurantioside C (C828) in  $\text{CD}_3\text{OD}$  (500MHz)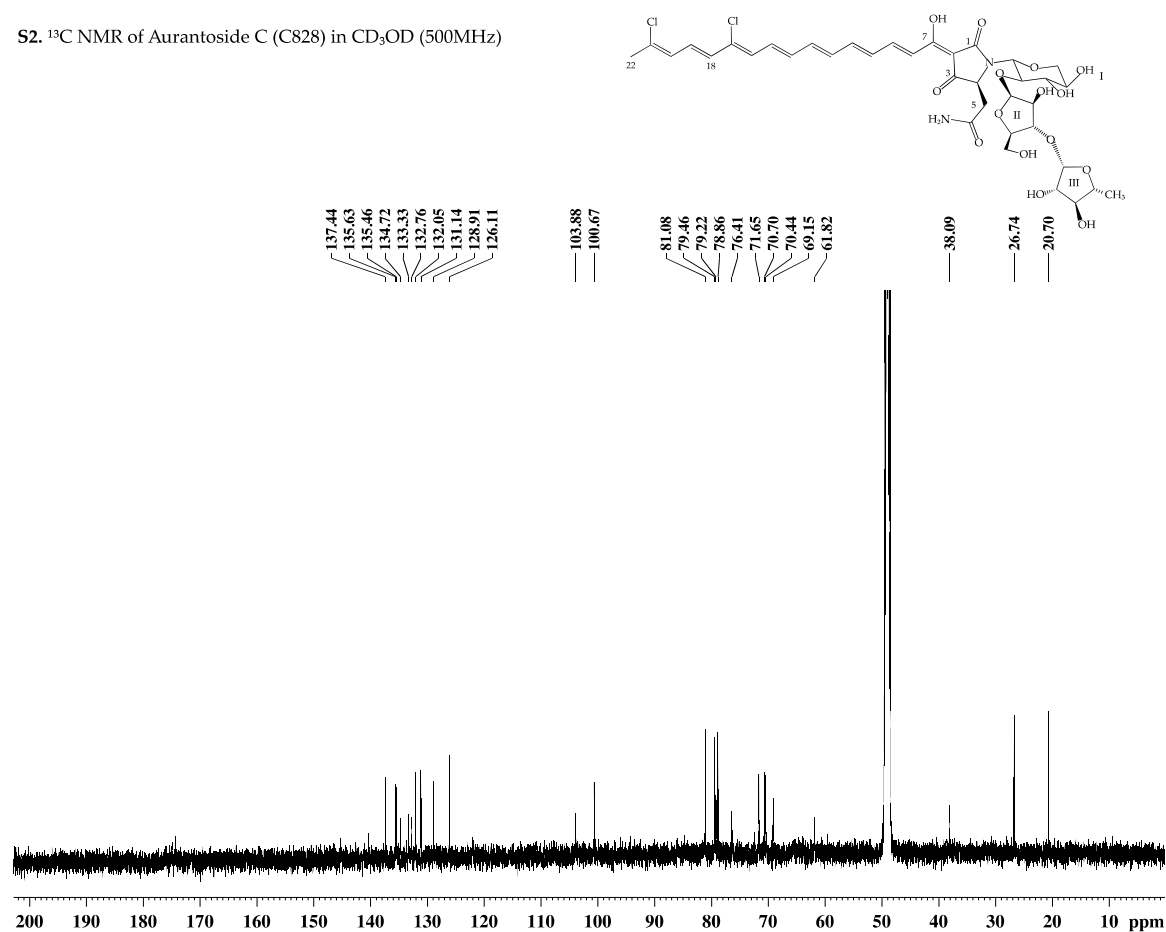

## S3. Cell viability of C828 in A. SUM159PT cells, B. MCF7 cells, and C. MCF10A cells at 24 h, 48 h and 72 h

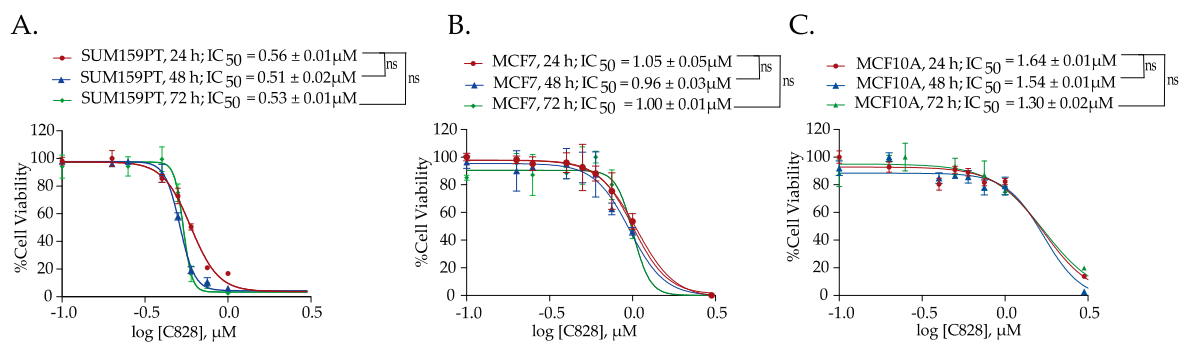

Supplement: s1 [file s1]
